# Supplementary material
Source: Elsevier journal article supplement (https://www.sciencedirect.com/science/article/pii/S2387020620302953)
Supplement: mmc2 [file S2387020620302953:mmc2.docx]

**Appendix 1**

**Search Strategy**

We ran the following search strategy in PubMed until March 2020:

1. “COVID-19” [All Fields] OR “SARS-COV-2” [All Fields] OR “novel coronavirus disease” [All Fields] OR “novel coronavirus pneumonia” [All Fields]
2. “Clinical laboratory” [All Fields] OR “Clinical laboratory” [Title/Abstract]
3. “Laboratory findings” [All Fields] OR “Laboratory findings” [Title/Abstract]
4. “non-COVID-19” [All Fields] OR “COVID-19” [All Fields]
5. “Severe” [All Fields] OR “critically ill” [All Fields]
6. 1 AND 2
7. 1 AND 3
8. 1 AND 2 AND 3
9. 1 AND 2 AND 4
10. 1 AND 2 AND 5
11. 1 AND 2 AND 3 AND 4
12. 1 AND 2 AND 3 AND 5
13. 1 AND 3 AND 4
14. 1 AND 3 AND 5
15. 1 AND 4
16. 1 AND 5
